# Supplementary material for: Glycemia and Its Relationship to Outcomes in the Metformin in Gestational Diabetes Trial
Source: PubMed Central journal article supplement — Diabetes Care. 2009 Oct 21;33(1):9–16. doi: 10.2337/dc09-1407 (PMC2797992; doi:10.2337/dc09-1407), 2009-10-21
Supplement: supp_dc09-1407_dc09-1407_Online_Appendix.pdf [file supp_dc09-1407_dc09-1407_Online_Appendix.pdf]

Table 1A: Baseline characteristics by tertiles of fasting and postprandial capillary glucose levels during treatment

|                                | Fasting            |                    |                    |            | Postprandial       |                    |                    |            |
|--------------------------------|--------------------|--------------------|--------------------|------------|--------------------|--------------------|--------------------|------------|
|                                | tertile 1<br>N=240 | tertile 2<br>N=246 | tertile 3<br>N=240 | P<br>value | tertile 1<br>N=238 | tertile 2<br>N=248 | tertile 3<br>N=238 | P<br>value |
| Age (SD)                       | 33.6±5.3           | 33.7±5.1           | 32.5±5.3           | 0.03       | 33.6±5.0           | 34.2±5.3           | 32.0±5.3           | <0.001     |
| BMI (kg/m <sup>2</sup> )       |                    |                    |                    |            |                    |                    |                    |            |
| < 20 weeks' gestation (n=724)  | 29.2±7.1           | 32.5±7.6           | 34.9±7.6           | <0.001     | 31.5±7.9           | 31.8±7.8           | 33.4±7.7           | 0.02       |
| At recruitment                 | 31.8±6.9           | 35.1±8.0           | 37.6±7.4           | <0.001     | 34.4±8.3           | 34.3±7.5           | 35.9±7.6           | 0.04       |
| BMI range (kg/m <sup>2</sup> ) |                    |                    |                    |            |                    |                    |                    |            |
| <25                            | 71 (29.6)          | 37 (15.1)          | 22 (9.2)           | <0.001     | 47 (19.7)          | 49 (19.8)          | 34 (14.3)          | 0.06       |
| 25-29                          | 78 (32.5)          | 64 (26.0)          | 39 (16.2)          |            | 68 (28.6)          | 63 (25.4)          | 50 (21.0)          |            |
| ≥30                            | 91 (37.9)          | 145 (58.9)         | 179 (74.6)         |            | 123 (51.7)         | 136 (54.8)         | 154 (64.7)         |            |
| BMI –adjusted for ethnicity*   |                    |                    |                    |            |                    |                    |                    |            |
| Normal                         | 51 (21.3)          | 28 (11.4)          | 20 (8.3)           | <0.001     | 35 (14.7)          | 36 (14.5)          | 28 (11.8)          | 0.04       |
| Overweight                     | 96 (40.0)          | 67 (27.2)          | 46 (19.2)          |            | 79 (33.2)          | 76 (30.7)          | 54 (22.7)          |            |
| Obese                          | 93 (38.7)          | 151 (61.4)         | 174 (72.5)         |            | 124 (52.1)         | 136 (54.8)         | 156 (65.5)         |            |
| Gestation at recruitment       | 30.8±2.8           | 30.0±3.4           | 29.5±3.4           | <0.001     | 30.5±2.9           | 30.2±3.3           | 29.6±3.5           | 0.01       |
| Ethnicity (self-reported)      |                    |                    |                    |            |                    |                    |                    |            |
| European/Caucasian             | 107 (44.6)         | 138 (56.1)         | 96 (40.0)          | <0.001     | 109 (45.8)         | 132 (53.2)         | 99 (41.6)          | <0.001     |
| Polynesian                     | 25 (10.4)          | 34 (13.8)          | 95 (39.6)          |            | 38 (16.0)          | 41 (16.5)          | 75 (31.5)          |            |

|                                                  |            |            |            |        |            |            |            |        |
|--------------------------------------------------|------------|------------|------------|--------|------------|------------|------------|--------|
| Indian                                           | 55 (22.9)  | 25 (10.2)  | 13 (5.4)   |        | 45 (18.9)  | 25 (10.1)  | 23 (9.7)   |        |
| Chinese and other SE Asian                       | 38 (15.8)  | 31 (12.6)  | 15 (6.3)   |        | 32 (13.4)  | 31 (12.5)  | 21 (8.8)   |        |
| Other or mixed                                   | 15 (6.3)   | 18 (7.3)   | 21 (8.7)   |        | 14 (5.9)   | 19 (7.7)   | 20 (8.4)   |        |
| Tertiary education                               | 136 (56.7) | 113 (45.9) | 72 (30.0)  | <0.001 | 123 (51.7) | 120 (48.4) | 78 (32.8)  | <0.001 |
| Smoking in pregnancy                             | 26 (10.8)  | 37 (15.0)  | 57 (23.8)  | <0.001 | 26 (10.9)  | 39 (15.7)  | 53 (22.3)  | 0.004  |
| Chronic hypertension                             | 19 (7.9)   | 20 (8.1)   | 19 (7.9)   | 1.0    | 17 (7.1)   | 20 (8.1)   | 21 (8.8)   | 0.8    |
| Nulliparity (no pregnancy beyond 20 weeks')      | 95 (39.6)  | 82 (33.3)  | 54 (22.5)  | <0.001 | 85 (35.7)  | 79 (31.9)  | 66 (27.7)  | 0.17   |
| Past Obstetric history                           |            |            |            |        |            |            |            |        |
| ≥ 3 terminations/miscarriage                     | 11 (4.6)   | 10 (4.1)   | 20 (8.3)   | 0.09   | 7 (2.9)    | 13 (5.2)   | 21 (8.8)   | 0.02   |
| GDM                                              | 45 (18.8)  | 53 (21.5)  | 74 (30.8)  | 0.01   | 53 (22.3)  | 54 (21.8)  | 65 (27.3)  | 0.29   |
| Preeclampsia                                     | 11 (4.6)   | 17 (6.9)   | 26 (10.8)  | 0.03   | 14 (5.9)   | 14 (5.7)   | 26 (10.9)  | 0.05   |
| Gestational hypertension                         | 16 (6.7)   | 16 (6.5)   | 28 (11.7)  | 0.07   | 15 (6.3)   | 14 (5.7)   | 31 (13.0)  | 0.005  |
| Baby >4000g                                      | 30 (12.5)  | 55 (22.4)  | 76 (31.7)  | <0.001 | 44 (18.5)  | 54 (21.8)  | 62 (26.1)  | 0.14   |
| Cesarean delivery                                | 47 (19.6)  | 55 (22.4)  | 66 (27.5)  | 0.11   | 55 (23.1)  | 63 (25.4)  | 49 (20.6)  | 0.45   |
| Delivery <37 wks                                 | 28 (11.7)  | 28 (11.4)  | 32 (13.3)  | 0.78   | 24 (10.1)  | 27 (10.9)  | 36 (15.1)  | 0.19   |
| Congenital anomaly                               | 6 (2.5)    | 13 (5.3)   | 8 (3.3)    | 0.25   | 7 (2.9)    | 10 (4.0)   | 10 (4.2)   | 0.73   |
| Maternal family history (1 <sup>st</sup> degree) |            |            |            |        |            |            |            |        |
| Diabetes                                         | 114 (47.5) | 108 (43.9) | 117 (48.8) | 0.54   | 106 (44.5) | 118 (47.6) | 113 (47.5) | 0.75   |
| Hypertension                                     | 98 (40.8)  | 94 (38.2)  | 90 (37.5)  | 0.73   | 99 (41.6)  | 96 (38.7)  | 86 (36.1)  | 0.47   |

|                                      |            |            |            |        |            |            |            |        |
|--------------------------------------|------------|------------|------------|--------|------------|------------|------------|--------|
| Preeclampsia                         | 18 (7.5)   | 30 (12.2)  | 19 (7.9)   | 0.140  | 26 (10.9)  | 22 (8.9)   | 19 (8.0)   | 0.52   |
| Blood pressure (mmHg) at recruitment |            |            |            |        |            |            |            |        |
| Systolic                             | 110.8±13.5 | 113.9±12.1 | 115.2±12.6 | <0.001 | 112.1±13.0 | 112.9±12.6 | 114.8±13.0 | 0.07   |
| Diastolic                            | 67.2±9.5   | 68.6±9.0   | 69.7±9.0   | 0.02   | 68.0±9.1   | 67.9±8.7   | 69.6±9.8   | 0.08   |
| 75g OGTT result (mmol)               |            |            |            |        |            |            |            |        |
| Fasting plasma glucose (n=651)       | 5.3±1.0    | 5.6±1.0    | 6.2±1.3    | <0.001 | 5.5±0.9    | 5.5±0.9    | 6.2±1.4    | <0.001 |
| 2-hour plasma glucose (n=639)        | 9.8±1.9    | 9.4±1.9    | 9.4±2.4    | 0.11   | 9.2±1.8    | 9.2±1.8    | 10.2±2.4   | <0.001 |
| HbA1c (%) (n=664)                    | 5.6±0.6    | 5.7±0.7    | 6.0±0.8    | <0.001 | 5.7±0.6    | 5.6±0.6    | 6.0±0.8    | <0.001 |
| Treatment                            |            |            |            |        |            |            |            |        |
| Metformin                            | 106 (44.2) | 120 (48.8) | 131 (54.6) | 0.07   | 120 (50.4) | 125 (50.4) | 110 (46.2) | 0.57   |
| Insulin                              | 134 (55.8) | 126 (51.2) | 109 (45.4) |        | 118 (49.6) | 123 (49.6) | 128 (53.8) |        |

\*BMI adjusted for ethnicity; Overweight: Polynesian ≥ 26-32, European ≥ 25-30, Indo-Asian > 23-27.5 kg/m<sup>2</sup>. Obese: Polynesian >32, European >30, Indo-Asian >27.5 kg/m<sup>2</sup>
